# Supplementary material
Source: PubMed Central journal article supplement (PMC6363817)
Supplement: mmc1.pdf [file mmc1.pdf]

# ICU Admission Muscle and Fat Mass, Survival, and Disability at Discharge

## A Prospective Cohort Study

*Ariel Jaitovich, MD; Malik M. H. S. Khan, MD; Ria Itty, MD; Hau C. Chieng, DO;  
Camille L. Dumas, DO; Pallavi Nadendla, MD; John P. Fantauzzi, MD;  
Recai M. Yucel, PhD; Paul J. Feustel, PhD; and Marc A. Judson, MD*

CHEST 2019; 155(2):322-330

*Online supplements are not copyedited prior to posting and the author(s) take full responsibility for the accuracy of all data.*

© 2018 AMERICAN COLLEGE OF CHEST PHYSICIANS. Reproduction of this article is prohibited without written permission from the American College of Chest Physicians. See online for more details. DOI: 10.1016/j.chest.2018.10.023

### **e-Appendix 1.**

**Further details on the methods:** To correct for variations of body size that could lead to differences in PMA, we calculated the ideal body weight based on the patients' height, gender and age using the Devine formula<sup>1</sup>. We chose not to calculate the body mass index as it entails weight's determination, which is easily confounded by the aggressive fluid administration often provided during the first hours of critical illness. To account for gender differences in muscle mass, we used an accepted adjustment factor of 1.67 multiplied by females' muscle area to compare with male muscle mass<sup>2,3</sup>. Determination of subcutaneous adipose tissue (SAT) was done using in-house software by a radiologist (CD) who was blinded to patient identifiers and clinical information as follows: the reader identified the axial image at the level of T7-8 intervertebral disc space. The SAT was manually determined on each patient and defined as the region of interest between the thoracic cavity/chest wall muscles (labeled with blue line in e-Figure 2) and the skin surface on the axial slice (labeled with green line in e-Figure 2). The area between the two lines was calculated as the aggregated SAT for each patient. All imaging findings were confirmed by a single board-certified cardiothoracic radiologist (JF).

The following baseline patient characteristics were evaluated: age, gender, preadmission morbidities known to be associated with muscle wasting: chronic pulmonary disease requiring any treatment including supplemental oxygen; cancer; diabetes mellitus (DM); congestive heart failure of a NYHA class II, III or IV; end stage renal disease; and corticosteroids use of an equivalent dose of prednisone of more than 15 mg daily for longer than 2 weeks prior to the date of enrollment<sup>4,5</sup>. That information was collected from the patients or patients' surrogates and confirmed with medical documentation in the electronic medical recording of Albany Medical Center. If images or other pertinent documents were not available for confirmation of a diagnosis that required them, efforts were made to obtain actual files via electronic transfer (push-through processing) or mailing in CDs with the images that were loaded in our system for review. If that procedure was not possible, we accepted English-written information signed by a credentialed physician in a scanned report, which was also incorporated to our medical records for further verification. Admission albumin values were collected and their univariable (e-Table 11) and multivariable (e-Tables 3, 6-8) associations with outcomes were determined. Severity of illness at ICU admission was measured by the Acute Physiology and Chronic Health Evaluation (APACHE) II and the Sequential Organ Failure Assessment (SOFA). Preadmission exercise limitation was determined in every patient using the Modified Medical Research Council (mMRC) scale<sup>6</sup> (e-Table 12). Out of the total 401 patients, 232 (57%) were able to furnish a response to the mMRC, and 170 (42%) were unable to do so. In that case, the score was obtained via a surrogate familiar with patients' daily life. Out

of this last group, 65 (38%) patients recovered communication capacity to report an mMRC score, which then replaced the surrogate's. Consistency between surrogates-reported and patients-reported scores was found to be higher 90% (e-Table 13).

Measured in-hospital outcomes were days of ICU admission and hospital survival. Post discharge outcome was attainment of independent living at discharge and six months survival. Attainment of independent living was defined as discharge to the patient's home with no need of assisted living. Patients discharged to hospice, long term acute care facilities, a nursing home, or transferred to another hospital were considered not having attained independent living.

Determination of nutritional status was made via the ICU nutritional service, that evaluates every patient at admission and on following days and documents that evaluation in electronic medical recording. Nutritional service provides tailored calories, fluids, proteins and other contents based on the specific patients' pathologies. If a patient is initially deemed to be at a low nutritional risk as reflected by standard scores (nutritional risk screening [NRS 2002], NUTRIC score)<sup>7</sup> and given his/her ability to intake target daily calories and protein content, the diet is not supplemented. Target nutritional goals are defined as an observed intake of more than 75% of meals' trays content. If the patient is considered at nutritional risk, the diet is supplemented via nutritional boosts, tube feeds/enteral tube or TPN, with the goal of reaching 100% of predicted nutritional needs. Information regarding nutritional supplementation in our cohort is presented in e-Table 14, and the association between calories and protein supplementation and outcomes is presented in e-Table 15.

### **References:**

- 1 Pai, M. P. & Paloucek, F. P. The origin of the "ideal" body weight equations. *Ann Pharmacother* **34**, 1066-1069, doi:10.1345/aph.19381 (2000).
- 2 Fuchs, G. *et al.* Lumbar skeletal muscle index derived from routine computed tomography exams predict adverse post-extubation outcomes in critically ill patients. *J Crit Care* **44**, 117-123, doi:10.1016/j.jcrc.2017.10.033 (2018).
- 3 Janssen, I., Heymsfield, S. B., Wang, Z. M. & Ross, R. Skeletal muscle mass and distribution in 468 men and women aged 18-88 yr. *J Appl Physiol* (1985) **89**, 81-88 (2000).
- 4 Bowyer, S. L., LaMothe, M. P. & Hollister, J. R. Steroid myopathy: incidence and detection in a population with asthma. *J Allergy Clin Immunol* **76**, 234-242 (1985).
- 5 Jaitovich, A. & Barreiro, E. Skeletal Muscle Dysfunction in Chronic Obstructive Pulmonary Disease (COPD): What We Know and Can Do for Our Patients. *Am J Respir Crit Care Med*, doi:10.1164/rccm.201710-2140CI (2018).
- 6 Mahler, D. A. & Wells, C. K. Evaluation of clinical methods for rating dyspnea. *Chest* **93**, 580-586 (1988).
- 7 McClave, S. A. *et al.* Guidelines for the Provision and Assessment of Nutrition Support Therapy in the Adult Critically Ill Patient: Society of Critical Care Medicine (SCCM) and American Society for Parenteral and Enteral Nutrition (A.S.P.E.N.). *JPEN J Parenter Enteral Nutr* **40**, 159-211, doi:10.1177/0148607115621863 (2016).

**e-Figure 1:** Sample computed tomography (CT) scans used to determine subcutaneous adipose tissue (SAT) in our cohort. SAT is defined as the area between the thoracic cavity/chest wall muscles (labeled with blue line) and the skin surface (labeled with green line); at the level of T7-T8.

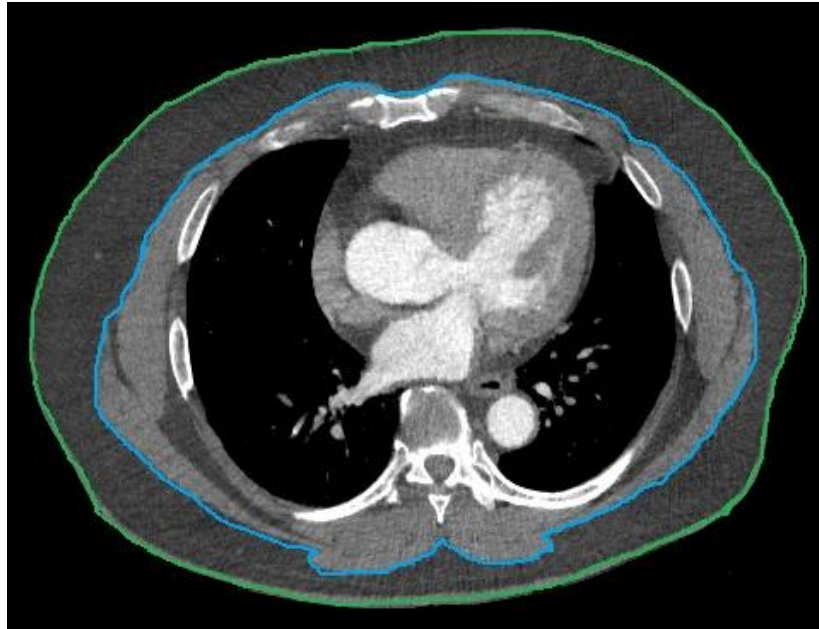

**e-Figure 2:** Pectoralis muscle area (PMA) depending on age ( $p < 0.001$ ;  $r^2 = 0.069$ ). Dotted lines are 95% prediction interval.

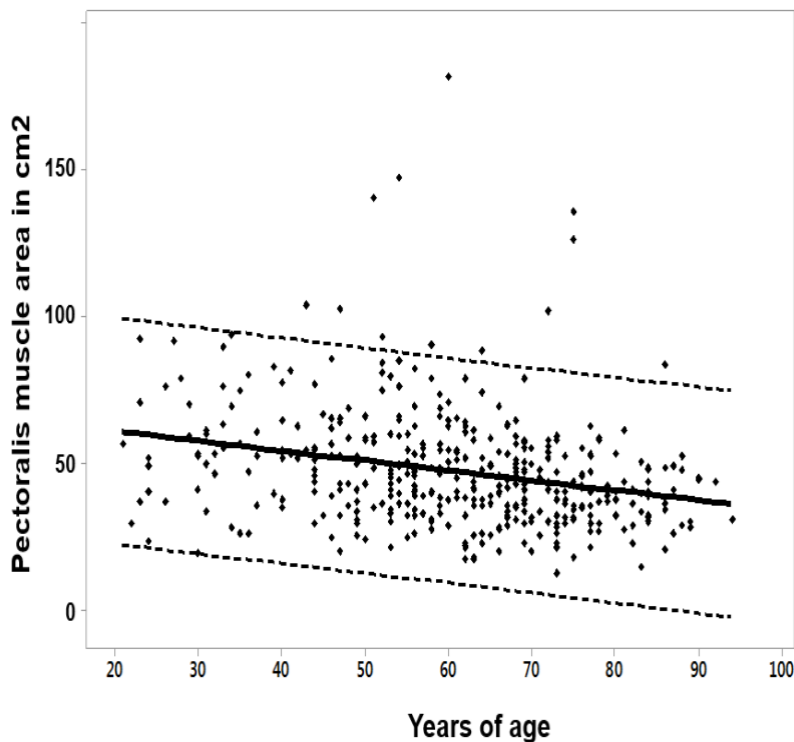

**e-Table 1:** Intra observer PMA variability

| e-Table 1: Intraobserver PMA variability |                                            |       |       |       |                    |        |        |        |                 |                 |                   |
|------------------------------------------|--------------------------------------------|-------|-------|-------|--------------------|--------|--------|--------|-----------------|-----------------|-------------------|
|                                          | First measurement                          |       |       |       | Second measurement |        |        |        | Results 1       | Results 1       | Difference        |
| Pt #                                     | LPMaj                                      | RPMaj | LPMin | RPMin | LPMaj2             | RPMaj2 | LPMin2 | RPMin2 | Aggreg #1       | Aggreg #2       | Dif #1-#2         |
| 5                                        | 1107                                       | 1048  | 498   | 477   | 1084               | 1038   | 493    | 475    | 31.3            | 30.9            | 0.4               |
| 10                                       | 1941                                       | 1579  | 553   | 422   | 1937               | 1562   | 550    | 408    | 44.95           | 44.57           | 0.38              |
| 62                                       | 1633                                       | 1729  | 357   | 586   | 1597               | 1732   | 360    | 578    | 43.05           | 42.67           | 0.38              |
| 85                                       | 2195                                       | 1904  | 709   | 1089  | 2210               | 1892   | 697    | 1105   | 58.97           | 59.04           | -0.07             |
| 96                                       | 1859                                       | 1734  | 503   | 502   | 1850               | 1740   | 499    | 503    | 45.98           | 45.92           | 0.06              |
| 99                                       | 1886                                       | 1823  | 452   | 747   | 1902               | 1854   | 440    | 758    | 49.08           | 49.54           | -0.46             |
| 108                                      | 2524                                       | 1608  | 475   | 639   | 2548               | 1600   | 483    | 630    | 52.46           | 52.61           | -0.15             |
| 117                                      | 1274                                       | 1356  | 652   | 479   | 1268               | 1369   | 666    | 490    | 37.61           | 37.93           | -0.32             |
| 130                                      | 1576                                       | 1975  | 446   | 571   | 1568               | 1960   | 436    | 588    | 45.68           | 45.52           | 0.16              |
| 134                                      | 1456                                       | 1405  | 963   | 798   | 1432               | 1428   | 952    | 807    | 46.22           | 46.19           | 0.03              |
| 138                                      | 1123                                       | 1534  | 747   | 487   | 1130               | 1527   | 756    | 502    | 38.91           | 39.15           | -0.24             |
| 143                                      | 951                                        | 998   | 479   | 438   | 968                | 1012   | 498    | 444    | 28.66           | 29.22           | -0.56             |
| 158                                      | 887                                        | 981   | 270   | 472   | 899                | 967    | 289    | 489    | 26.1            | 26.44           | -0.34             |
| 163                                      | 1288                                       | 1159  | 610   | 519   | 1303               | 1167   | 630    | 523    | 35.76           | 36.23           | -0.47             |
| 201                                      | 1299                                       | 1720  | 316   | 740   | 1278               | 1734   | 323    | 748    | 40.75           | 40.83           | -0.08             |
| 240                                      | 677                                        | 870   | 260   | 323   | 694                | 888    | 245    | 330    | 21.3            | 21.57           | -0.27             |
| 273                                      | 831                                        | 883   | 254   | 326   | 845                | 890    | 253    | 320    | 22.94           | 23.08           | -0.14             |
| 340                                      | 2069                                       | 2371  | 466   | 553   | 2078               | 2365   | 460    | 544    | 54.59           | 54.47           | 0.12              |
| 352                                      | 1836                                       | 1945  | 650   | 732   | 1850               | 1940   | 670    | 722    | 51.63           | 51.82           | -0.19             |
| 384                                      | 1367                                       | 1234  | 606   | 653   | 1370               | 1256   | 599    | 634    | 38.6            | 38.59           | 0.01              |
|                                          |                                            |       |       |       |                    |        |        |        | <b>Total #1</b> | <b>Total #2</b> | <b>Difference</b> |
|                                          |                                            |       |       |       |                    |        |        |        | 814.54          | 816.29          | 1.75              |
|                                          | <b>Bias=-0.0875 cm<sup>2</sup> (±0.54)</b> |       |       |       |                    |        |        |        |                 |                 |                   |

**e-Table 2:** Primary indication of CT chest in our cohort: Although 403 patients/CT scans were enrolled, only 401 were analyzed in the end (see figure 2 in the main paper). We report here the indications of all the CTs.

| <b>e-Table 2: Primary indications for CT chest (total 403)*</b> |               |          |
|-----------------------------------------------------------------|---------------|----------|
| <b>Indication</b>                                               | <b>Number</b> | <b>%</b> |
| Suspected pulmonary embolism                                    | 131           | 32       |
| Respiratory distress                                            | 60            | 15       |
| Suspected pneumonia or atelectasis                              | 57            | 14       |
| Suspected or documented trauma                                  | 44            | 11       |
| Suspected cavitory lesion or effusion                           | 30            | 7        |
| Suspected metastasis or mediastinal mass                        | 29            | 7        |
| Suspect vascular abnormality                                    | 15            | 3.7      |
| Hemoptysis                                                      | 12            | 3        |
| Unspecified chest X ray abnormality                             | 10            | 2.5      |
| Unspecified chest pain                                          | 10            | 2.5      |
| Suspected pneumomediastinum /pneumothorax                       | 5             | 1        |

\*Although 403 patients/CT scans were enrolled, only 401 were analyzed in the end (see figure 2 in the main paper). We report here the indications of all the CTs.

**e-Table 3:** Primary indications of ICU admission, including patients requiring and not requiring CT chest within 24 hours of admission.

| <b>e-Table 3: Primary indications for ICU admission, including and excluding CT chest done at ICU admission</b> |                                                                              |          |                                                                                  |          |           |
|-----------------------------------------------------------------------------------------------------------------|------------------------------------------------------------------------------|----------|----------------------------------------------------------------------------------|----------|-----------|
| <b>Indication</b>                                                                                               | <b>Including patients who got CT chest at admission<sup>#</sup> (n=1856)</b> |          | <b>Excluding patients who got CT chest at admission<sup>&amp;</sup> (n=1368)</b> |          | <b>p=</b> |
|                                                                                                                 | <b>Number</b>                                                                | <b>%</b> | <b>Number</b>                                                                    | <b>%</b> |           |
| Non-respiratory sepsis                                                                                          | 593                                                                          | 32       | 442                                                                              | 32       | 0.82      |
| Respiratory failure                                                                                             | 402                                                                          | 21       | 271                                                                              | 20       | 0.2       |
| Metabolic cause including DKA                                                                                   | 222                                                                          | 12       | 166                                                                              | 12       | 0.88      |
| Hemorrhagic shock                                                                                               | 143                                                                          | 7.7      | 115                                                                              | 8        | 0.46      |
| Stroke/seizure/altered mental status                                                                            | 123                                                                          | 6.6      | 97                                                                               | 7        | 0.6       |
| Cardiovascular decompensation                                                                                   | 106                                                                          | 5.7      | 86                                                                               | 6        | 0.49      |
| Pulmonary embolism                                                                                              | 91                                                                           | 5        | 80                                                                               | 6        | 0.23      |
| Trauma                                                                                                          | 33                                                                           | 1.7      | 21                                                                               | 1.5      | 0.59      |
| Other causes                                                                                                    | 143                                                                          | 8        | 90                                                                               | 6.5      | 0.22      |

<sup>#</sup> That includes all the patients admitted to the ICU during the enrollment period.

<sup>&</sup> That includes all the patients admitted to the ICU during the enrollment period, except the ones that got CT chest done within 24 hours of admission and thus considered for enrollment (488 patients), see figure 2 of the main paper.

**e-Table 4:** Primary indication of ICU admission in our cohort versus general census during the enrolling period.

| <b>e-Table 4: Primary indications for ICU admission in our cohort versus general census</b> |                                    |          |                           |          |                  |
|---------------------------------------------------------------------------------------------|------------------------------------|----------|---------------------------|----------|------------------|
| <b>Indication</b>                                                                           | <b>Overall population (n=1856)</b> |          | <b>Our cohort (n=401)</b> |          | <b>p=</b>        |
|                                                                                             | <b>Number</b>                      | <b>%</b> | <b>Number</b>             | <b>%</b> |                  |
| Non-respiratory sepsis                                                                      | 593                                | 32       | 71                        | 17       | <b>&lt;0.001</b> |
| Respiratory failure                                                                         | 402                                | 21       | 171                       | 42       | <b>&lt;0.001</b> |
| Metabolic cause including DKA                                                               | 222                                | 12       | 13                        | 3.2      | <b>&lt;0.001</b> |
| Hemorrhagic shock                                                                           | 143                                | 7.7      | 22                        | 5.4      | <b>0.006</b>     |
| Stroke/seizure/altered mental status                                                        | 123                                | 6.6      | 21                        | 5.1      | <b>0.03</b>      |
| Cardiovascular decompensation                                                               | 106                                | 5.7      | 15                        | 3.7      | <b>0.01</b>      |
| Pulmonary embolism                                                                          | 91                                 | 5        | 66                        | 16       | <b>&lt;0.001</b> |
| Trauma                                                                                      | 33                                 | 1.7      | 11                        | 2.7      | 0.58             |
| Other causes                                                                                | 143                                | 8        | 11                        | 2.7      | <b>&lt;0.001</b> |

**e-Table 5:** Primary indication of ICU admission in our cohort versus patients not performed CT chest at the time of ICU admission.

| <b>e-Table 5: Primary indications for ICU admission in our cohort versus patients with no CT chest performed at admission</b> |                                                  |          |                           |          |                  |
|-------------------------------------------------------------------------------------------------------------------------------|--------------------------------------------------|----------|---------------------------|----------|------------------|
| <b>Indication</b>                                                                                                             | <b>Patients with no CT at admission (n=1368)</b> |          | <b>Our cohort (n=401)</b> |          | <b>p=</b>        |
|                                                                                                                               | <b>Number</b>                                    | <b>%</b> | <b>Number</b>             | <b>%</b> |                  |
| Non-respiratory sepsis                                                                                                        | 442                                              | 32       | 71                        | 17       | <b>&lt;0.001</b> |
| Respiratory failure                                                                                                           | 271                                              | 20       | 171                       | 42       | <b>&lt;0.001</b> |
| Metabolic cause including DKA                                                                                                 | 166                                              | 12       | 13                        | 3.2      | <b>&lt;0.001</b> |
| Hemorrhagic shock                                                                                                             | 115                                              | 8        | 22                        | 5.4      | 0.098            |
| Stroke/seizure/altered mental status                                                                                          | 97                                               | 7        | 21                        | 5.1      | 0.29             |
| Cardiovascular decompensation                                                                                                 | 86                                               | 6        | 15                        | 3.7      | 0.089            |
| Pulmonary embolism                                                                                                            | 80                                               | 6        | 66                        | 16       | <b>&lt;0.001</b> |
| Trauma                                                                                                                        | 21                                               | 1.5      | 11                        | 2.7      | 0.076            |
| Other causes                                                                                                                  | 90                                               | 6.5      | 11                        | 2.7      | <b>0.0069</b>    |

**e-Table 6:** Multivariable analysis: risk factors of hospital mortality: Females PMA was multiplied by 1.67 in this analysis.

| <b>e-Table 6: Multivariable analysis: Risk factors of hospital mortality</b> |                   |               |                  |
|------------------------------------------------------------------------------|-------------------|---------------|------------------|
| <b>Variable</b>                                                              | <b>Odds Ratio</b> | <b>95% CI</b> | <b>p value</b>   |
| PMA (Muscle area, per cm <sup>2</sup> )                                      | 0.96              | 0.94-0.984    | <b>&lt;0.001</b> |
| SOFA score                                                                   | 1.25              | 1.14-1.36     | <b>&lt;0.001</b> |
| Albumin                                                                      | 0.55              | 0.35-0.85     | <b>0.021</b>     |
| mMRC                                                                         | 1.1845            | 0.95-1.465    | 0.07             |
| Age                                                                          | 0.988             | 0.968-1.0096  | 0.62             |
| SAT (adipose tissue)                                                         | 0.694             | 0.37-1.304    | 0.102            |

**e-Table 7:** Multivariable analysis of associations with ICU-free days to day 28: Females PMA was multiplied by 1.67 in this analysis.

| <b>e-Table 7: Multivariable analysis of ICU-free days to day 28</b> |                  |                |                  |
|---------------------------------------------------------------------|------------------|----------------|------------------|
| <b>Variable</b>                                                     | <b>Slope</b>     | <b>95% CI</b>  | <b>p value</b>   |
| PMA (Muscle area, per cm <sup>2</sup> )                             | 0.056 +/- 0.002  | 0.01-0.09      | <b>0.007</b>     |
| SOFA score                                                          | -0.67 +/- 0.104  | -0.88-0.47     | <b>&lt;0.001</b> |
| Albumin                                                             | 1.351 +/- 0.529  | 0.31-2.38      | <b>0.011</b>     |
| mMRC                                                                | -1.28 +/- 1.07   | 3.3-1.19       | 0.584            |
| Age                                                                 | 0.0481 +/- 0.024 | -0.00012-0.096 | 0.052            |
| SAT (adipose tissue)                                                | -0.005 +/- 0.003 | -0.0012-0.0016 | 0.137            |

**e-Table 8:** Multivariable analysis: risk factors of disability at hospital discharge: Females PMA was multiplied by 1.67 in this analysis.

| <b>e-Table 8: Multivariable analysis of disability at hospital discharge</b> |           |               |                  |
|------------------------------------------------------------------------------|-----------|---------------|------------------|
| <b>Variable</b>                                                              | <b>OR</b> | <b>95% CI</b> | <b>p value</b>   |
| PMA (Muscle area, per cm <sup>2</sup> )                                      | 1.00      | 0.99-1.01     | 0.937            |
| SOFA score                                                                   | 1.12      | 1.03-1.22     | <b>0.007</b>     |
| Albumin                                                                      | 0.59      | 0.40-0.87     | <b>0.007</b>     |
| mMRC                                                                         | 4         | 1.88-8.51     | <b>&lt;0.001</b> |
| Age                                                                          | 1.04      | 1.02-1.06     | <b>&lt;0.001</b> |
| SAT (adipose tissue)                                                         | 1.00      | 1.00-1.00     | 0.794            |



**e-Table 9:** Outcomes' raw values by genders

| e-Table 9: Outcomes raw values by gender |               |             |               |         |
|------------------------------------------|---------------|-------------|---------------|---------|
|                                          | Overall n (%) | Males n (%) | Females n (%) | p value |
| Died during hospitalization              | 58 (14.4)     | 30 (13.8)   | 28 (15.7)     | 0.56    |
| Independent at hospital discharge        | 228 (56.8)    | 133 (61)    | 96 (53)       | 0.1     |

**e-Table 10:** Correction of females' muscle sizes by ideal body weight and adjustment factor 1.67<sup>2,3</sup>.

| e-Table 10: p values of PMA over outcomes: Unadjusted/raw value; by IBW; or by gender (1.67 X PMA in females) |                         |                    |                         |                   |
|---------------------------------------------------------------------------------------------------------------|-------------------------|--------------------|-------------------------|-------------------|
|                                                                                                               | ICU-free days at day 28 | Hospital mortality | Disability at discharge | 6-months survival |
| Raw PMA                                                                                                       | $p=0.037$               | $p=0.003$          | $p=0.51$                | $p<0.001$         |
| PMA/IBW                                                                                                       | $p=0.032$               | $p<0.001$          | $p=0.41$                | $p<0.001$         |
| PMA X 1.67                                                                                                    | $p=0.021$               | $p<0.001$          | $p=0.56$                | $p<0.001$         |

IBW: Ideal body weight; PMA: Pectoralis muscle area; 1.67 correction factor used for female gender<sup>1,2</sup>

**e-Table 11:** Association between admission serum albumin and outcomes

| e-Table 11: Association between admission serum albumin and outcomes        |                          |                                 |            |
|-----------------------------------------------------------------------------|--------------------------|---------------------------------|------------|
| 6-months survival                                                           | Alive 6 months           | Not alive at 6 months           | $p=<0.001$ |
|                                                                             | 3.4 (3.1-3.9)            | 2.9 (2.5-3.4)                   |            |
| Hospital survival                                                           | Alive at discharge       | Not alive at hospital discharge | $p=<0.001$ |
|                                                                             | 3.3 (2.9-3.8)            | 2.88 (2.4-3.3)                  |            |
| Disability at discharge                                                     | Independent at discharge | Not independent at discharge    | $p=<0.001$ |
|                                                                             | 3.46 (3-3.9)             | 3.1 (2.8-3.7)                   |            |
| Correlation between serum albumin and ICU free days:<br>$r^2=0.48, p<0.001$ |                          |                                 |            |

**e-Table 12:** Modified Medical Research Council (mMRC)

| <b>e-Table 12: mMRC dyspnea score</b>                                                                                        |
|------------------------------------------------------------------------------------------------------------------------------|
| <b>1:</b> Dyspnea when strenuous exercise                                                                                    |
| <b>2:</b> Dyspnea when hurrying on the level or walking up a slight hill                                                     |
| <b>3:</b> Walks slower than most people on the level, or stops after a mile or so, or stops after 15 min walking at own pace |
| <b>4:</b> Stops for breath after walking 100 yards (91m), or after few minutes on level ground                               |
| <b>5:</b> Too dyspneic to leave the house or breathless when dressing                                                        |

**e-Table 13:** mMRC determination in our cohort

| <b>e-Table 13: mMRC determination</b>                               | <b>Total</b> | <b>Percentage</b> |
|---------------------------------------------------------------------|--------------|-------------------|
| Patients responding to mMRC at the time of consent:                 | 232          | 57%               |
| Patient's surrogate responding to mMRC at the time of consent:      | 170          | 42%               |
| Out of the surrogates' responding group:                            |              |                   |
| Patients who never regained capacity to provide mMRC score:         | 105          | 62% (105/170)     |
| Patients who regained capacity to provide mMRC score                | 65           | 38% (65/170)      |
| Patients who provided mMRC score similar from initially obtained:   | 60           | 92% (60/65)       |
| Patients who provided mMRC score different from initially obtained: | 5            | 8% (5/65)         |

**e-Table 14:** Nutritional supplementation summary in our cohort

| <b>e-Table 14: Nutritional supplementation summary</b>                   |                   |                           |
|--------------------------------------------------------------------------|-------------------|---------------------------|
|                                                                          | <b>Number (%)</b> | <b>PMA cm2 (IQR)</b>      |
| <b>Total patients with no nutritional support (low nutritional risk)</b> | <b>184 (45%)</b>  | <b>40.4 (26.26-51.25)</b> |
| <b>Total patients with nutritional support (high nutritional risk)</b>   | <b>218 (55%)</b>  | <b>37.5 (25.8-45.8)</b>   |
|                                                                          |                   | <b>p=0.11</b>             |
| <b><u>Type of nutritional support</u></b>                                |                   |                           |
| Enteral G-tube feeding                                                   | 188 (86%)         |                           |
| PO boosts with no G-tube involved                                        | 22 (10%)          |                           |
| Total parenteral nutrition (TPN)                                         | 8 (4%)            |                           |

**e-Table 15:** Calories supplementation and outcomes; Protein supplementation and outcomes

| <b>e-Table 15.</b>                           |                                 |                                 |           |
|----------------------------------------------|---------------------------------|---------------------------------|-----------|
| <b>Calories supplementation and outcomes</b> |                                 |                                 |           |
| <b>Outcome</b>                               | <b>Kcal/IBW/d<br/>(IQR)</b>     | <b>Kcal/IBW/d<br/>(IQR)</b>     | <b>p=</b> |
| <b>6-months survival</b>                     | <b>Survivors</b>                | <b>Non-survivors</b>            | 0.45      |
|                                              | 32.1 (28.1-35.6)                | 32.3 (29.5-35.2)                |           |
| <b>Hospital survival</b>                     | <b>Survivors</b>                | <b>Non-survivors</b>            | 0.11      |
|                                              | 32.1 (28.1-35.6)                | 32.6 (30.5-35.5)                |           |
| <b>Disability at discharge</b>               | <b>Non-disabled</b>             | <b>Disabled</b>                 | 0.22      |
|                                              | 32.8 (29.1-35.8)                | 31.1 (27.8-34.5)                |           |
| <b>Protein supplementation and outcomes</b>  |                                 |                                 |           |
| <b>Outcome</b>                               | <b>Proteins/IBW/d<br/>(IQR)</b> | <b>Proteins/IBW/d<br/>(IQR)</b> | <b>p=</b> |
| <b>6-months survival</b>                     | <b>Survivors</b>                | <b>Non-survivors</b>            | 0.67      |
|                                              | 1.44 (1.2-1.65)                 | 1.47 (1.25-1.65)                |           |
| <b>Hospital survival</b>                     | <b>Survivors</b>                | <b>Non-survivors</b>            | 0.47      |
|                                              | 1.44 (1.23-1.64)                | 1.48 (1.31-1.69)                |           |
| <b>Disability at discharge</b>               | <b>Non-disabled</b>             | <b>Disabled</b>                 | 0.57      |
|                                              | 1.46 (1.24-1.67)                | 1.43 (1.21-1.64)                |           |

### e-Table References

- 1 Fuchs, G. *et al.* Lumbar skeletal muscle index derived from routine computed tomography exams predict adverse post-extubation outcomes in critically ill patients. *J Crit Care* 44, 117-123, doi:10.1016/j.jcrc.2017.10.033 (2018).
- 2 Janssen, I., Heymsfield, S. B., Wang, Z. M. & Ross, R. Skeletal muscle mass and distribution in 468 men and women aged 18-88 yr. *J Appl Physiol* (1985) 89, 81-88 (2000).
- 3 McClave, S. A. *et al.* Guidelines for the Provision and Assessment of Nutrition Support Therapy in the Adult Critically Ill Patient: Society of Critical Care Medicine (SCCM) and American Society for Parenteral and Enteral Nutrition (A.S.P.E.N.). *JPEN J Parenter Enteral Nutr* 40, 159-211, doi:10.1177/0148607115621863 (2016).
